# Deep-Learning-Based Multivariate Pattern Analysis (dMVPA): A Tutorial and a Toolbox

1 **Karl M. Kuntzeman<sup>1,2</sup>, Jacob M. Williams<sup>3</sup>, Phui Cheng Lim<sup>1,4</sup>, Ashok Samal<sup>3</sup>, Prahalada K.**  
2 **Rao<sup>5</sup>, & Matthew R. Johnson<sup>1,4\*</sup>**

3 <sup>1</sup>Center for Brain, Biology and Behavior, University of Nebraska-Lincoln, Lincoln, NE, USA

4 <sup>2</sup>Office of Technology Development and Coordination, National Institute of Mental Health, National  
5 Institute of Health, Bethesda, MD, USA

6 <sup>3</sup>Department of Computer Science and Engineering, University of Nebraska-Lincoln, Lincoln, NE,  
7 USA

8 <sup>4</sup>Department of Psychology, University of Nebraska-Lincoln, Lincoln, NE, USA

9 <sup>5</sup>Department of Mechanical and Materials Engineering, University of Nebraska-Lincoln, Lincoln,  
10 NE, USA

## 11 \* Correspondence:

12 Matthew R. Johnson

13 matthew.r.johnson@gmail.com

14 **Keywords: deep learning, cognitive neuroscience, machine learning, EEG, fMRI, neural**  
15 **networks, Python, MVPA**

## 16 Abstract

17 In recent years, multivariate pattern analysis (MVPA) has been hugely beneficial for cognitive  
18 neuroscience by making new experiment designs possible and by increasing the inferential power of  
19 functional magnetic resonance imaging (fMRI), electroencephalography (EEG), and other  
20 neuroimaging methodologies. In a similar time frame, “deep learning” (a term for the use of artificial  
21 neural networks with convolutional, recurrent, or similarly sophisticated architectures) has produced  
22 a parallel revolution in the field of machine learning and has been employed across a wide variety of  
23 applications. Traditional MVPA also uses a form of machine learning, but most commonly with  
24 much simpler techniques based on linear calculations; a number of studies have applied deep learning  
25 techniques to neuroimaging data, but we believe that those have barely scratched the surface of the  
26 potential deep learning holds for the field. In this paper, we provide a brief introduction to deep  
27 learning for those new to the technique, explore the logistical pros and cons of using deep learning to  
28 analyze neuroimaging data – which we term “deep MVPA,” or dMVPA – and introduce a new  
29 software toolbox (the “Deep Learning In Neuroimaging: Exploration, Analysis, Tools, and  
30 Education” package, DeLINEATE for short) intended to facilitate dMVPA for neuroscientists (and  
31 indeed, scientists more broadly) everywhere.

32 **Word Count:** 11929

33 **Figures:** 3

34 **Tables:** 1

## 35 1 Introduction

36 Although the roots of cognitive neuroscience date to the 1920s (the advent of  
37 electroencephalography, EEG; Berger, 1929), the modern neuroimaging era began in the mid-1990s,  
38 with the development of functional magnetic resonance imaging (fMRI) methodology and the  
39 increasingly widespread availability of (affordable) desktop computing workstations powerful  
40 enough to process fMRI datasets. In those days, data analysis was primarily limited to univariate  
41 investigations such as event-related potentials (ERPs) in EEG and univariate general linear model  
42 (GLM) analyses aimed at detecting “blobs” of activation with fMRI (as well as differences in  
43 activity, e.g. between experimental conditions, within such blobs)<sup>1</sup>. However, the march of progress  
44 towards ever-more sophisticated models of brain function and the testing of ever-more refined  
45 hypotheses has created a demand for corresponding improvements in analysis techniques.

46 Thus, somewhat more recently (beginning in the early-to-mid-2000s), a second age in neuroimaging  
47 analysis arose with the advent of multivariate pattern analysis (MVPA; Haxby et al., 2001; Haxby et  
48 al., 2014). Rather than focusing on whether a certain cognitive event elicits activity in a particular  
49 cluster of fMRI voxels (or a voltage peak at a particular temporal latency with ERP), MVPA is  
50 instead concerned with how a neural pattern or multivariate “brain state” comprising multiple voxels  
51 (fMRI) or electrode/timepoint combinations (EEG) might collectively correspond to a certain  
52 cognitive event or state. Numerous MVPA variations exist, including those based on correlation  
53 (either Pearson or rank-based; Haxby et al., 2001), support vector machines (SVMs; De Martino et  
54 al., 2008; Dosenbach et al., 2010), logistic regression (Akama et al., 2012), sparse multinomial  
55 logistic regression (SMLR; Kohler et al., 2013; Krishnapuram et al., 2005), naïve Bayes classifiers  
56 (Kassam et al., 2013), and more. Many of these techniques concern classification of brain patterns  
57 into discrete cognitive states, whereas others examine different aspects of the data (e.g., overall  
58 similarity between brain patterns; Xue et al., 2010; Lim et al., 2019) without explicit categorization,  
59 but all of them represent increases in mathematical and conceptual sophistication over univariate  
60 techniques. Importantly, when compared to earlier univariate techniques, MVPA has enabled us to  
61 examine in a much more nuanced fashion how brain activity patterns encode mental states.

62 Although traditional MVPA techniques are substantially more advanced than univariate techniques,  
63 they are nonetheless still fairly simple, both mathematically and conceptually. Traditional MVPA is a  
64 form of machine learning (ML), but it is among the simplest forms; most MVPA approaches use  
65 straightforward linear mathematical models. This comparative simplicity certainly confers  
66 advantages – for example, faster computation times than more complex techniques (with some  
67 caveats<sup>2</sup>), and a generally lower risk of “overfitting”<sup>3</sup>. However, simpler mathematical formulations

2

---

<sup>1</sup> Although most of our discussion focuses on fMRI and EEG, as those are the most common techniques in our field of cognitive neuroscience, most points should translate well to related technologies like structural MRI, magnetoencephalography (MEG), or electrocorticography (ECoG), and even to less closely related methods such as extracellular recordings (e.g., from rodents or nonhuman primates).

<sup>2</sup> For example, SVMs may take inordinately long to converge on extremely high-dimensional datasets that are handled more easily by deep neural networks. As discussed later, deep networks also have better support for GPU-based parallelization than simpler linear techniques, which can offset their computational costs.

<sup>3</sup> The creation of a predictive model that is highly customized to the data used to train the model, but generalizes poorly to new datasets that do not perfectly match the idiosyncrasies of the training data; a significant concern in ML. A good analogy is a bespoke garment perfectly tailored to the contours of a specific individual, which would fit him/her perfectly

68 are necessarily limited in what we call “informational resolution” – the specificity of the neural  
69 patterns and cognitive states that they are able to capture.

70 How much informational resolution is required to glean as much about brain function as is possible  
71 using current neuroimaging technology? The answer is hard to pin down, partly because it is difficult  
72 to establish firm estimates of the “noise ceiling”<sup>4</sup> for these techniques. As neuroimagers, we often  
73 complain that our techniques are “noisy,” but with proper usage, the signal-to-noise ratios of EEG  
74 and fMRI are really rather high, when considering only measurement noise from the instruments  
75 themselves and the surrounding physical environment. Of significantly greater concern are “noise”  
76 sources such as subject head/body motion, physiological artifacts (cardiac, respiratory, muscular,  
77 etc.), and cognitive artifacts (distraction, poor understanding of instructions, falling asleep). Noise  
78 ceilings for certain analytic techniques and datasets can be estimated (Kay et al., 2008; Nili et al.,  
79 2014), but ultimately they will depend on which data components are considered “noise”; aside from  
80 the noise that arises from the physics of the measurement itself, other biological and subject-driven  
81 artifacts have some hope of being detected, modeled, and/or removed. And, much like the signal  
82 components we actually care about (i.e., those related to our experimental questions), our ability to  
83 detect and account for noise depends largely on the sophistication of our analytic techniques.

84 What we do know is that the brain is a highly complex, highly nonlinear system (Koch & Laurent,  
85 1999; Sporns et al., 2000; Buzsaki & Mizuseki, 2014), and the addition of noise sources that are also  
86 complex and nonlinear makes brain data no easier to analyze and interpret. Although the limits of the  
87 usefulness of traditional MVPA, with its relatively low informational resolution, have not yet been  
88 reached, those limits do loom on the horizon. As the size of neuroscience data continues to grow<sup>5</sup>,  
89 traditional MVPA’s limitations become ever more apparent. It is a statistical truism that more  
90 complex analytic models, with more parameters to fit, allow us to account for a greater proportion of  
91 a dataset’s variance, but they also require larger input data to estimate their parameters reliably. Yet  
92 the sizes of many contemporary datasets are now such that they can potentially accommodate  
93 significantly more sophisticated statistical models than traditional MVPA, with greater power to  
94 identify, extract, and distinguish noise sources and signals of interest. Thus, we believe it is time for  
95 cognitive neuroscience and related fields to place increased emphasis on developing, exploring, and  
96 using more sophisticated techniques, and on producing tools that can be used to perform that  
97 exploration more effectively and efficiently.

## 98 **1.1 The case for deep learning**

99 There are numerous potential analytic methods of greater complexity and sophistication than  
100 traditional MVPA. One class of ML techniques that has been gaining popularity, and the one we  
101 endorse in this paper, is “deep learning.” Deep learning, briefly defined, refers to the use of artificial

---

but look terrible on most others. Conversely, an off-the-rack outfit with a simpler design would fit many individuals of<sup>3</sup>  
roughly similar proportions reasonably well.

<sup>4</sup> Informally defined, the best we might be expected to do in using statistics to explain variance in the data, accounting for  
the fact that a certain amount of unexplainable variance, aka noise, will always exist.

<sup>5</sup> E.g., from better spatiotemporal resolution due to technological improvements; from increasingly large sample sizes,  
particularly from big-data initiatives such as the Human Connectome Project (Van Essen et al., 2013) and OpenNeuro  
(formerly OpenfMRI; Poldrack et al., 2013); and simply from the ongoing accumulation of data stockpiles from many  
years’ worth of research studies.

102 neural networks (ANNs), typically with recurrent and/or convolutional architectures, that are more  
103 complex, flexible, and powerful than both earlier generations of ANN architectures and the  
104 techniques used for traditional MVPA. In the last few years, such deep neural networks (DNNs) have  
105 been used increasingly heavily in a number of fields that employ ML for all kinds of purposes. Such  
106 usage includes an ever-growing collection of studies in human neuroscience and related disciplines,  
107 although a relatively small proportion have been devoted to neuroimaging analysis, and fewer still  
108 devoted to decoding cognitive states from functional measurements of brain activity, which is a topic  
109 of great interest to many. We believe the studies so far represent only the tip of the proverbial iceberg  
110 in terms of what is achievable by using DNNs to analyze neuroscience datasets. In fact, we believe  
111 deep learning has the potential to perform most of the tasks for which traditional MVPA is typically  
112 employed, but with greater speed, flexibility, and power, and thus we advocate for the more  
113 widespread use of what we call “deep MVPA,” or dMVPA for short.

114 To achieve more widespread adoption of deep learning in the neurosciences, notable challenges to  
115 confront include 1) a relatively low level of knowledge/awareness of these techniques, and 2)  
116 insufficient availability of software tools to make dMVPA as approachable as traditional MVPA. In  
117 this paper we address the first challenge by providing a brief review of deep learning techniques,  
118 including how they can be used in neuroscience investigations, and the pros and cons of dMVPA  
119 versus traditional MVPA. We address the second challenge by introducing a new Python-based  
120 software toolbox (the “Deep Learning In Neuroimaging: Exploration, Analysis, Tools, and  
121 Education” package; DeLINEATE for short) that builds upon previous DNN and MVPA tools and  
122 aims to make dMVPA more approachable and efficient for other researchers.

## 123 **2 dMVPA: A tutorial**

### 124 **2.1 A brief history of neural networks**

125 The techniques we now collectively call “deep learning” are generally extensions of older “shallow”  
126 ANNs, which are significantly less complex and powerful than DNNs but not much different in their  
127 basic principles. The concept behind all ANNs originates from a highly abstracted view of non-  
128 artificial neural networks, i.e., the biological nervous system (Figure 1A). In this framework, most  
129 implementation details are stripped away, and what remains is the basic idea of a network of simple  
130 computational units (“neurons”) that receive input (which can typically be excitatory or inhibitory),  
131 perform an operation on their inputs (typically some variation on summation), and produce an output  
132 (typically a single value analogous to an action potential or a firing rate), which might then serve as  
133 input to one or more downstream neurons<sup>6</sup>. The original and simplest case is the McCulloch-Pitts  
134 neuron (McCulloch & Pitts, 1943; Figure 1B), a processing unit whose input and output values are  
135 exclusively binary (0 or 1). The McCulloch-Pitts neuron sums its inputs, compares the sum to some  
136 threshold value, and outputs a 1 (“action potential”) or 0 according to whether the sum exceeds the  
137 threshold. Although a pioneering idea and an interesting (if highly simplified) early model of neural

---

<sup>6</sup> It should be noted up front that the artificial “neurons” used in ML applications bear about as much resemblance to real neurons as a paper airplane bears to a commercial airliner. In both cases, the barest core principles are similar between the pared-down model and the real thing, but little else. However, despite the low resemblance, ANNs can still be extremely useful tools for ML and data processing. Readers are nonetheless cautioned to be as circumspect about over-aggressive comparisons between artificial and real neural networks as they would about buying transatlantic tickets on paper airplanes.

138 information processing, McCulloch-Pitts neurons can only implement a limited set of functions and  
 139 are thus not considered very useful for modern ML applications.

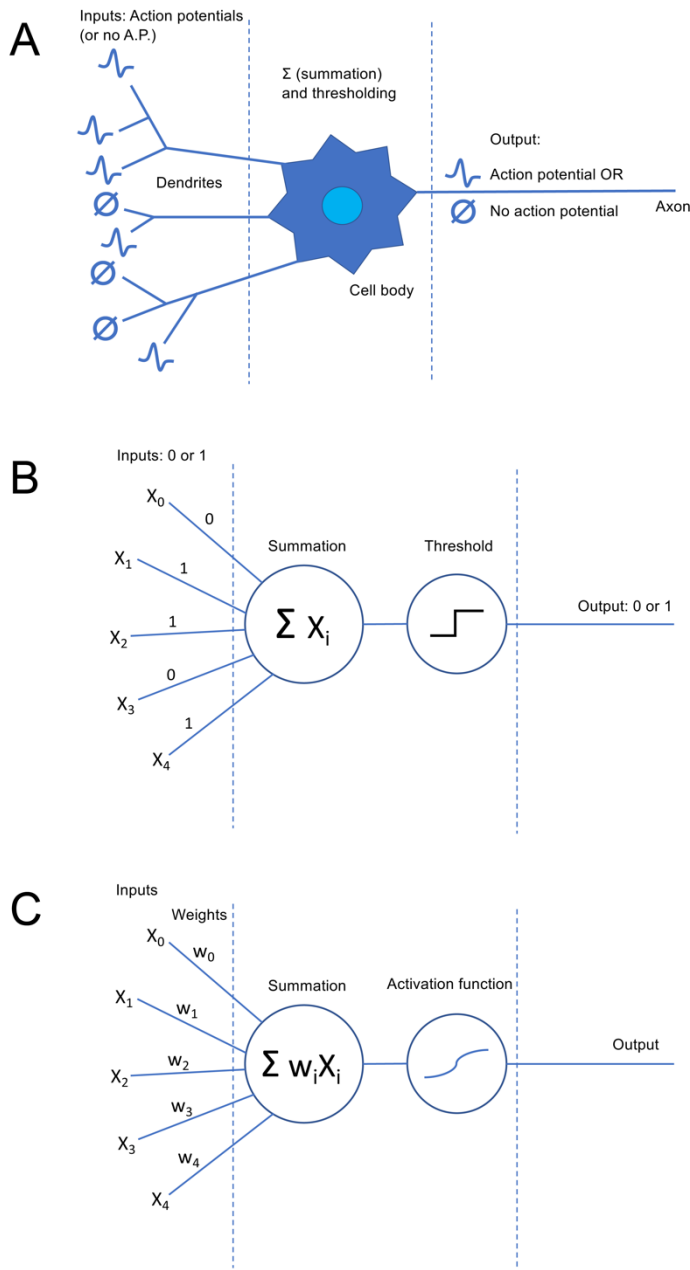

**Figure 1. Comparison of biological and artificial neural models.**

(A) A simplified “textbook” model of a biological neuron. Inputs come in via the dendrites in the form of action potentials (or the lack thereof). The inputs are summed in the cell body (soma) and, if the threshold voltage is reached, the cell produces an action potential as output that is delivered via the cell's axon. (B) The original and simplest version of an artificial neuron model, the McCulloch-Pitts neuron. Similar to the biological neuron, inputs ( $x_i$ ) and outputs are binary (although we now know this to be an oversimplified view of biological neurons). Inputs are summed and the result passed to a thresholding function; if the threshold is met, an output of 1 is produced, and otherwise the output is 0. (C) A perceptron, a more sophisticated revision of the McCulloch-Pitts neuron that has an important place in modern artificial neural networks. The concept of trainable weights ( $w_i$ ; mimicking biological potentiation at synapses) is introduced, and inputs are now multiplied by their corresponding weight before summation. In addition, in contemporary perceptron models, the threshold function can be replaced by any arbitrary function, called the “activation function.” Popular activation functions like the hyperbolic tangent may still act largely like thresholding functions, but with the ability to deliver graded rather than strictly binary output values.

140 A few years later, though, ANNs took a significant step forward when Rosenblatt (1958)  
 141 incorporated Hebb's theoretical views on the strengthening and weakening of synaptic connections  
 142 (Hebb, 1949) into a McCulloch-Pitts-like unit that came to be called the *perceptron*<sup>7</sup>. In its simplest  
 143 form, a perceptron (Figure 1C) is largely identical to a McCulloch-Pitts neuron with one critical

<sup>7</sup> As originally conceived, “perceptron” referred to a more complex network of units that could be implemented in a physical machine to produce artificial vision, hence the name. However, the most salient feature that researchers latched onto was the structure of the neural units, and via synecdoche “perceptron” came to be the name of such a unit, so there is some degree of fuzziness around nomenclature and definitions. Here, we use the contemporary sense of “perceptron” to refer to the architecture of an artificial neural unit, rather than the original plan for the physical perceptron machine.



144 addition: Each input is now associated with a “synaptic weight” (often denoted  $w_0, w_1$ , etc.) that  
145 determines whether it is excitatory or inhibitory and how strongly it influences the output.  
146 Summation is then performed on the inputs after they have been multiplied by their respective  
147 weights. Statistically inclined readers may recognize this as not-dissimilar-to a regression model,  
148 particularly logistic regression; to conceptually convert between a multiple regression model and a  
149 perceptron, simply rename the weights from the  $\beta_i$  typically used in regression equations to  $w_i$  and  
150 pass the regression output through a thresholding function, logistic function (to essentially replicate  
151 logistic regression), or other function as desired<sup>8</sup>. This function is known as the artificial neuron’s  
152 *activation function*; activation functions are a key feature of contemporary ANN designs, and there  
153 are many options to choose from.

154 In most important ways, the perceptron-like artificial neural units used in some DNNs today are not  
155 substantially different than the classical perceptrons discussed by Minsky and Papert (1969) in their  
156 seminal book some 50 years ago. Yet the original perceptron architectures retained many of the  
157 McCulloch-Pitts neurons’ limitations and still had significant constraints on the classes of problems  
158 they could solve. The key developments that distinguish the powerful deep learning techniques of  
159 today from the toy models of the past are 1) improved methods for establishing what the proper  
160 synaptic weights should be for a given dataset/problem, i.e., *training* the neural network, and 2) new  
161 and ultimately better ways of digitally connecting groups of artificial neurons together into more  
162 complex structures, i.e., improved ANN *architectures*<sup>9</sup>.

## 163 2.2 Training algorithms and neural network architectures

164 The earliest ANN architectures were very simple indeed; either a single artificial neuron or, in the  
165 next major architectural advance after that, a *layer* of such units. In this latter (still very simple)  
166 architecture, the units are *fully connected*, meaning that each unit receives a copy of each possible  
167 input value (see Figure 2A). Note that in this figure, as in many neural network diagrams, inputs and  
168 outputs are represented as “layers” of a sort, but there is only one true layer of computational units<sup>10</sup>.  
169 If the ANN is meant to calculate a classification problem (a common application), the outputs are  
170 typically assumed to each correspond to one of the possible classes, and are interpreted in a winner-  
171 take-all fashion (i.e., for a given set of input data, whichever output value is highest is interpreted as  
172 the network’s prediction of the class that the input data belong to). Although the transition from  
173 single-neuron to single-layer architectures laid a critical foundation for later work, single layers of  
174 perceptrons were soon shown not to be terribly useful as artificial intelligence agents, no matter what  
175 their synaptic weights were or how those weights were determined. As Minsky and Papert  
176 demonstrated in *Perceptrons* (1969), it is mathematically impossible for any single-layer perceptron

6

---

<sup>8</sup> The concept of the perceptron is also somewhat looser than the McCulloch-Pitts neuron regarding whether inputs and outputs are constrained to be binary or can be continuously valued, and regarding what kind of thresholding or other function the summed inputs are passed through in order to create the output.

<sup>9</sup> Not to mention the ~billion-fold increase in computational power (IBM 704 at 12,000 flops versus a recent desktop GPU at ~11 *teraflops*, for an NVIDIA GeForce GTX 1080 Ti) that helps to make such sophisticated architectures viable.

<sup>10</sup> In a biological neural network, one might relate these to a layer of dendrites, a layer of cell bodies, and a layer of axons, but all of those together would comprise a single layer of neurons.

177 network – no matter how many units are in it – to perform certain fundamental computational  
178 operations<sup>11</sup>.

179 This revelation may not seem surprising in retrospect; after all, a single layer of neurons, all receiving  
180 the same inputs, is not a very viable architecture for a biological neural network either. Still, it was  
181 enough to significantly dampen enthusiasm for ANN research for over a decade. Although adding  
182 another layer of computational units (known as a *hidden layer*) would allow the network to maintain  
183 an intermediate representation of the input and enable more complex operations<sup>12</sup>, the algorithms  
184 available for training single-layer perceptron networks could not be readily extended to multi-layer  
185 architectures. In the 1980s, however, interest was reignited with the popular (re-)discovery of the  
186 *backpropagation* algorithm (or simply *backprop*, to its friends). This algorithm was known and even  
187 applied to ANNs previously (Linnainmaa, 1970; Werbos, 1974), but it did not reach mainstream  
188 awareness until the publication of Rumelhart and colleagues' (Rumelhart et al., 1986a; Rumelhart et  
189 al., 1986b) seminal formulations of it. Backprop proved to be a highly robust method for training  
190 ANNs across many applications, and is still the dominant training algorithm in use today.

191 The main principle behind backprop is to take any errors made by the network during training and  
192 propagate responsibility for them from the output layer (where the error is assessed, by comparing  
193 the network's decision to the known correct decision<sup>13</sup>) backwards through the network towards the  
194 input layer, penalizing the synaptic weights most responsible for the error along the way. It is  
195 analogous to the human behavior encapsulated by the vernacular phrase, "Shit rolls downhill." For  
196 example, imagine that a CEO – the final decision-maker in her company's chain of command –  
197 makes a decision that loses the company money. She turns to her immediate inferiors and doles out  
198 punishment to them proportional to how influential they were in guiding that decision, and decides to  
199 trust those influential individuals less in the future. In turn, each of those upper-level managers  
200 passes along the punishment and distrust they have received to their immediate inferiors, again  
201 proportional to their influence on the upper managers' actions, and so on down the corporate  
202 hierarchy. In this way, one hopes that the next time a similar decision is faced, the shift in influences  
203 and communication channels throughout the hierarchy will produce a better outcome.

204 The advent of effective backprop-based training for ANNs reignited interest in them for a time, and  
205 backprop-trained ANNs were found to perform admirably in a number of ML domains. Still, before  
206 long, interest waned again, as neural nets with many hidden layers were found to present  
207 mathematical difficulties for backpropagation algorithms, and complex networks also took a long  
208 time to train on the CPUs of the era. Concurrently, the 1990s also saw the development of promising  
209 alternative ML algorithms, most notably the modern incarnation of support vector machines (SVMs;  
210 Cortes & Vapnik, 1995; Boser et al., 1992). SVMs were easier to work with than ANNs and  
211 performed nearly equivalently (or even better) in many problem domains of the time. Thus, when  
212 traditional MVPA techniques arose in neuroimaging in the 2000s, it is unsurprising that SVMs and

7

---

<sup>11</sup> Put more formally, single-layer networks cannot solve problems that are not linearly separable, which famously includes the relatively simple XOR function. (For binary inputs A and B, respond "yes" if A is true and B is false, or if A is false and B is true, but respond "no" if A and B have the same value.)

<sup>12</sup> Including XOR and many others.

<sup>13</sup> As backprop is performed by comparing the performance of a network on a training dataset against an already-known ground truth for that dataset, it is thus considered a form of *supervised learning*, in ML parlance.

213 other similarly robust linear classification algorithms, well-suited to the mid-sized datasets of the  
214 time, dominated within that emerging field.

### 215 **2.3 The deep learning Renaissance**

216 Research interest in ANNs experienced another upswing, which has continued to the present,  
217 beginning around 2006. This rebirth happened for several reasons, including: 1) solutions to some of  
218 the technical and mathematical problems that had plagued networks with complex, many-layered  
219 architectures (Hinton et al., 2006); 2) methods for training ANNs on desktop workstations using the  
220 GPU instead of the CPU, producing speed improvements of up to ~70x (Raina et al., 2009); 3) the  
221 advent of the so-called “Big Data” era, which provided the larger datasets required to adequately  
222 train more complex neural architectures; and 4) the re-branding of neural net research as “Deep  
223 Learning,” which, despite being more public relations than true substance, still likely helped ignite  
224 new interest in a field formerly seen as relatively tired and unpopular. Since this Renaissance began,  
225 there have naturally been several key architectural and methodological developments<sup>14</sup>. However,  
226 these newer architectures are still trained and used similarly to the older, simpler networks described  
227 above, and the variations are not too difficult to comprehend once one understands the fundamental  
228 concepts and terminology behind ANNs.

229 During the early days of this revival, deep learning research had a number of notable successes,  
230 including advances in speech recognition, natural language processing, computer vision, financial  
231 fraud detection, and more. Large technology companies, who had access to Big Data and financial  
232 motivations for finding better ways to process it, also had their interest piqued. Thus they began to  
233 invest in deep learning research themselves, including developing improved software tools (for  
234 example, the TensorFlow toolbox, developed primarily at Google, and PyTorch, developed primarily  
235 at Facebook). These tools typically rely on lower-level driver and software library support for GPU-  
236 based computation, most notably NVIDIA’s CUDA libraries for general GPU-accelerated computing  
237 and their cuDNN framework, built atop CUDA, specifically for DNN applications<sup>15</sup>. Although the  
238 use of such tools has exploded in the technology sphere and in basic computer science research,  
239 adoption in other areas, such as cognitive neuroscience, has been slower. This lag can partly be  
240 attributed to fundamental limitations and difficulties of DNN-based data analysis (e.g., potential for  
241 overfitting), but another large factor is the lack of higher-level software tools that make it convenient  
242 for neuroscience researchers to implement dMVPA without needing to write large amounts of their  
243 own code. And, when better software tools exist, it will be more efficient to explore the space of  
244 possibilities and limitations of dMVPA. In short, neuroscience and related fields need more software  
245 tools that match, or exceed, the versatility and ease-of-use of existing traditional MVPA tools. This is  
246 the goal of the DeLINEATE toolbox (Deep Learning In Neuroimaging: Exploration, Analysis, Tools,  
247 and Education), which we introduce below.

---

<sup>14</sup> E.g., the use of ReLU activation functions (Maas, Hannun, and Ng, 2013); new approaches to regularization (Zeiler & Fergus, 2013); and other architectural elements that were available earlier became more prominently used, once sufficient data and computing power existed to use them more effectively (e.g., convolutional network layers).

<sup>15</sup> However, alternatives for other GPU architectures do exist, such as the CoreML library used in Apple devices, which use primarily non-NVIDIA GPUs.



## 248 2.4 Pros, cons, and caveats of dMVPA

249 *Pro: Potentially greater suitability for complex, many-featured datasets.* As discussed earlier, one  
250 great promise of dMVPA is the potential to unearth more fine-grained patterns in neuroscience data  
251 than the simpler (and commonly linear) techniques of traditional MVPA. However, a fundamental  
252 principle of statistics is that more powerful (i.e., more complex) models require more parameters<sup>16</sup>,  
253 and reliably estimating more parameters requires larger input datasets. Hence, why deep learning and  
254 Big Data are commonly associated with each other. Unlike, say, the Google Images team, most  
255 neuroscientists are unfortunately not swimming in training data for sophisticated machine learning;  
256 neuroscience data are frequently “Big,” but more from features<sup>17</sup> than from number of examples<sup>18</sup>. Of  
257 course, in deep learning (and most statistical analyses), the inverse situation is usually more  
258 desirable: A relatively large ratio of examples to features.

259 Potential solutions to the too-many-features problem include finding ways to intelligently select  
260 (*feature selection*) or algorithmically condense<sup>19</sup> the feature set. However, beyond those options,  
261 most traditional MVPA techniques do not many choices for constraining the feature set, and in  
262 particular lack any built-in ability to take the structure of the input data into account. This is  
263 unfortunate because neuroscience data<sup>20</sup> tend to be highly structured (temporally and spatially) in  
264 ways that could be informative for MVPA<sup>21</sup>. DNNs, on the other hand, have numerous potential  
265 architectural configurations that can be optimized to take advantage of known structure in the input  
266 data. Most notably, certain types of ANN layers (e.g., convolutional layers) can handle multi-  
267 dimensional input data, whereas traditional MVPA’s linear classifiers typically just vectorize multi-  
268 dimensional inputs. Thus, dMVPA makes it possible to design customized classifiers that are more  
269 suited to a particular shape/dimensionality of input data.

270 *Caveat.* Having more architectural options for structuring and condensing complex input data also  
271 leads to a paradox of choice; how can one possibly decide on the best DNN architecture for a given  
272 dataset? Unfortunately, dMVPA is still a young field, and we are still working on establishing good  
273 heuristics for network architectures to handle many-featured datasets. Also unfortunately, this is not  
274 one of those methodological choices where differences between options can be chalked up to

9

---

<sup>16</sup> “Parameters” used in the statistical sense, i.e., numeric values that need to be estimated.

<sup>17</sup> In the machine learning sense; for example, the number of voxels in a trial of fMRI data or the number of (electrodes × timepoints) in a trial of EEG data.

<sup>18</sup> Also in the machine learning sense, i.e., instances of a set of features that can be assigned a category label. In psychology and neuroscience, such “examples” are generally called “trials” (e.g., of a cognitive task), although in some cases examples may correspond to experimental subjects – an even more limited resource.

<sup>19</sup> For example, in techniques like elastic nets (Zou & Hastie, 2005) or SMLR, which use regularization or similar tricks to reduce the number of predictor features.

<sup>20</sup> Again, our discussion focuses on neuroscience data, but these techniques, lessons, and software tools can readily be translated to related (or even not-so-related) research fields with similarly-structured datasets and classification problems.

<sup>21</sup> For example, it may be useful to condense several spatially adjacent EEG electrodes with similar waveforms into a single data channel. Or, if trying to classify whether a subject is viewing faces or houses, to construct a feature detector that is sensitive to a certain voltage peak (say, the N170; Bentin 1996) but time-invariant within a ~20ms window, to account for trial-to-trial latency variability.

275 rounding error; the wrong dMVPA architecture may completely fail to perform above chance in  
276 situations where a superior architecture classifies the data fairly accurately.

277 *Con: Many potential types of analysis architecture; many of these carry an increased danger of*  
278 *overfitting.* Most conventional MVPA techniques (SVM, SMLR, etc.) have a relatively small number  
279 of hyperparameters<sup>22</sup> to adjust, and those hyperparameters can often either be left at default values or  
280 automatically estimated by the algorithm without serious adverse effects on performance. In contrast,  
281 the number of possible hyperparameters to adjust in dMVPA is effectively infinite. These  
282 hyperparameters include the number of layers in the network, the number of units in each layer, the  
283 type of each layer<sup>23</sup>, and any number of additional layer-type-specific hyperparameters that can be  
284 separately specified for each layer. Thus, even choosing a starting point for how to construct a  
285 dMVPA model can be daunting for inexperienced researchers (and experienced ones, too).  
286 Furthermore, thanks to the No Free Lunch (NFL) theorem(s) (Wolpert & Macready, 1997; Shalev-  
287 Shwartz & Ben-David, 2014), we know that no estimation- or optimization-based analysis technique  
288 will be optimal for every dataset or problem domain, and therefore it is impossible to know *a priori*  
289 whether a given analysis technique will be optimal for a particular problem. Put another way, if we  
290 knew in advance that a particular analysis technique *were* optimal for our problem, then that  
291 technique would necessarily be exquisitely tailored to the problem – which means we would  
292 essentially already know the structure of the data perfectly, which obviates the need to conduct the  
293 analysis.

294 Compounding the problem, there is no real upper limit, other than available computing power, to  
295 how complex dMVPA models can be allowed to grow<sup>24</sup>. For the current status quo of neuroscience  
296 data, most possible dMVPA models would be far too complex; many would even contain more  
297 parameters to estimate than there are data points in the input set! It would be inaccurate to say these  
298 models would fit the data poorly; rather, they would fit the training data *too* well. It is not uncommon  
299 to see a complex dMVPA model effectively memorize its training data, producing perfect  
300 classification of the training dataset but extremely poor generalization to a test dataset – the classic  
301 problem of overfitting.

302 *Caveat.* Much as SVMs provide a fairly robust method for classification across a surprisingly wide  
303 range of data types and problem domains (though they are rarely truly optimal due to NFL), there is  
304 some hope that such “pretty good, most of the time” dMVPA architectures might exist as well.  
305 Again, the field is young, but during development of the DeLINEATE toolbox, we have often found  
306 that relatively simple dMVPA models, consisting of just 1–2 convolutional layers and 1–2 dense

---

<sup>22</sup> This term is less commonly used in the MVPA literature than the ANN literature, but it refers essentially to a parameter of the algorithm set by the user before running the analysis (for example, the amount of regularization), to distinguish those values from plain (non-hyper) parameters, which are the values estimated by the statistical process or model-fitting algorithm.

<sup>23</sup> A full rundown of layer types is beyond this article’s scope and better-suited to a general introduction to deep learning, but common types include perceptron-style “dense” layers, “convolutional” layers, “recurrent” layers, and supporting utility layers that calculate simpler mathematical functions; discussed in more detail below.

<sup>24</sup> Complexity could be defined many ways, but for now, we will use it mainly to refer to how many parameters (not hyperparameters) need to be estimated for a given model.

307 layers<sup>25</sup>, perform comparably to (or better than) the industry workhorse of SVMs. A bit of  
308 customization is often required to fit the size and shape of the input dataset, and it can be useful to  
309 test out different variations of dMVPA architecture on one portion of the dataset before applying the  
310 best-performing architecture to the remaining held-out data, but a satisfactory architecture is typically  
311 not too difficult to find without excessive trial-and-error. We have found that after some experience  
312 using dMVPA, one begins to develop fairly good intuitions about what kinds of architecture might be  
313 best suited to a specific problem, but it is still far from an exact science.

314 As the field progresses, we hope that it will converge on more heuristics for designing dMVPA  
315 architectures that perform as robustly as SVMs across datasets, while still retaining the flexibility and  
316 other advantages of dMVPA. Still, for many practical applications, it is less important to identify an  
317 optimal model than it is to determine if the data can be reliably classified above chance (Hebart &  
318 Baker, 2018). With properly implemented cross-validation, this can often be achieved by a wide  
319 variety of architectures (assuming the data do contain enough meaningful signal for reliable  
320 decoding), with the accuracy difference between sets of hyperparameters being only a few percentage  
321 points. Conversely, if the input data contain only noise with respect to the classification problem, any  
322 sane architecture should perform at chance on the test set. Thus, while some trial and error may be  
323 necessary before deciding that data cannot be classified, exhaustive model search is seldom required.  
324 When possible, it is often helpful to conduct a traditional MVPA to get a ballpark estimate of how a  
325 reasonably well-configured dMVPA should be expected to perform.

326 *Pro: Intrinsically multiclass classification.* One advantage of dMVPA whose value is likely  
327 underestimated is that it is straightforward to design a “true” multiclass classifier, whereas most  
328 traditional MVPA methods are intrinsically binary. Thus, in traditional MVPA, multiclass decisions  
329 must generally be built from a combination of binary classifiers<sup>26</sup>. While there is nothing  
330 methodologically wrong *per se* with building multiclass decisions from binary ones, the implications  
331 are slightly different than those of a true multi-way decision, which should be taken into account  
332 when interpreting results. Furthermore, in some commonly-used MVPA tools (e.g., PyMVPA), the  
333 multiclass decision procedure is not always transparent to the end user, which can be a point of  
334 confusion. Conversely, dMVPA classifiers are able to consider all classification options  
335 simultaneously; as a consequence, it is also trivially easy to obtain meaningful prediction scores  
336 across all classes for each example in the testing set, which can then be used in analyses that go  
337 beyond simple winner-take-all accuracy measures.

338 *Pro/Con: Performance.* Performance, in the sense of speed, can be either an advantage or a  
339 disadvantage of dMVPA. Although dMVPA network architectures can vary so widely that it is  
340 difficult to generalize, *prima facie* dMVPA should typically run slower than traditional MVPA,  
341 because the calculations involved in training a dMVPA network are more complex. However, for  
342 larger datasets (in terms of numbers of features and/or examples), the performance of traditional  
343 MVPA techniques may scale more poorly than dMVPA. (See “Benchmarks” below and Table 1 for  
344 details.) Thus, beyond a certain dataset size, dMVPA may be the only feasible choice. Also, because

---

<sup>25</sup> Technically, these “deep” MVPA networks would not be very deep in terms of how many layers they contain. Still, a fair portion of “deep” learning these days does not use particularly complex network structures; the term now seems to refer more to the contemporary era of ANN-based data analysis than any particular network structure.

<sup>26</sup> Typically, if we have classes ABC, the multiclass decision would be made either by training up classifiers “A vs not-A,” “B vs not-B,” and “C vs not-C,” or by training up classifiers “A vs B,” “A vs C,” and “B vs C,” and then summing up the scores in favor of each category across classifiers in order to obtain an overall score for that category.

345 the network architecture of dMVPA can be adjusted, researchers have more options; e.g., whether to  
346 employ a simpler network that may not achieve maximum accuracy but runs quickly, versus a more  
347 complex network that runs slower.

348 *Caveat.* As alluded earlier, dMVPA’s computational costs can be somewhat offset by parallelization,  
349 which is better supported by deep-learning software tools than most traditional MVPA tools. This is  
350 true even if parallelizing across CPUs/cores, but especially true if using the computer’s GPU. Results  
351 vary widely depending on dataset size, network architecture, and the specific hardware involved, but  
352 users might roughly anticipate anywhere from a 5x–100x or more speedup for running dMVPA on a  
353 GPU versus a CPU. On one hand, these benefits make dMVPA a more competitive option, speed-  
354 wise. On the other hand, GPU-accelerated dMVPA does require more specialized hardware and more  
355 human effort setting up the relevant drivers and software packages. While we have striven in our  
356 toolbox and documentation to keep this process as painless as possible, it is still more effort than is  
357 required to run non-GPU-accelerated analyses; whether that effort is well-spent will heavily depend  
358 on individual users and what tasks they are trying to accomplish.

359 *Pro: Flexibility of applications.* Although our focus has been on dMVPA, we should note that  
360 modern neural networks have an ever-increasing number of uses beyond simple classification. For  
361 example, one currently popular strategy is to train a model for categorization within some domain  
362 (e.g., the contents of a photograph) and then interrogate the model’s intermediate layers, in an  
363 attempt to understand what strategy the model is using (Zeiler & Fergus, 2014). Autoencoder-style  
364 architectures allow for, e.g., unsupervised learning of feature structure (Xie et al., 2016), feature-  
365 sharpening for degraded inputs (Lore et al., 2017), and principled fusion of multimodal data (Ngiam  
366 et al., 2011). Deep networks can also be used to implement classification techniques that are not well-  
367 suited to traditional MVPA – for example, “transfer learning,” in which a network is initially trained  
368 on one dataset, and then refined by training it further on a different dataset. As another example, we  
369 have recently explored using deep networks to create “smarter” similarity/distance metrics tailored to  
370 particular datasets/applications, unlike traditional formula-based metrics (e.g., Pearson correlation,  
371 Euclidean distance), which do not afford such flexibility (Williams et al., 2020). The DeLINEATE  
372 toolbox can, with varying degrees of effort, support many of these advanced applications.

373 *Con: Field and dependencies are in active development.* While the software tools for traditional  
374 MVPA will presumably keep receiving periodic updates, the field overall is fairly mature and not  
375 changing particularly rapidly. However, deep learning and dMVPA are newer; as such, the  
376 techniques and their underlying software tools are continually being updated. This means that  
377 documentation can rapidly go out of date, and incompatibilities can arise easily if developers are not  
378 careful. We have aspired to make our own toolbox as robust as possible to the changing software  
379 landscape, but it is still worth being aware of. Of course, there are mitigating strategies: Users can  
380 find one version that works and refuse to update anything, but this deprives them of future  
381 enhancements. Alternately, they can continually update, but this makes it harder to exactly replicate  
382 earlier work run with previous software versions. If only Python toolboxes (our DeLINEATE  
383 toolbox, and the Keras/PyMVPA backends it relies on) are updated, Python’s “virtual environment”  
384 feature can be helpful for maintaining different software setups, each in their own containers. But, if  
385 later updates require newer hardware drivers, *and* users wish to maintain backward compatibility  
386 with their earlier work, they may wish to do what our lab has done: Purchase several small hard  
387 drives for each machine, set up a fresh operating system for each new major driver version, and  
388 simply reboot from a different boot drive when one wishes to work with current vs. legacy versions  
389 of the software.



## 390 2.5 A brief introduction to network architecture

391 In an abstract sense, all feedforward<sup>27</sup> neural networks may be viewed as a collection of  
392 mathematical operations to be applied in sequence to an input of some fixed size, along with rules for  
393 updating the parameters of those operations during training. In a classic perceptron, the core  
394 operations are multiplication (input data times weight values), summation, and then activation (a  
395 thresholding operation, traditionally). In a *multi-layer* perceptron network (Figure 2A), this complete  
396 multiplication-summation-activation sequence is repeated, with each layer's outputs becoming the  
397 next layer's inputs. A typical, slightly simplified mental model for such networks treats those  
398 multiplication-summation-activation operations as all occurring within a self-contained unit or node,  
399 like in a biological neuron; a number of such units in parallel constitutes a layer of the network, and  
400 the main free parameter chosen by the designer of the network is the number of units in each layer.  
401 However, unlike a biological neuron, in an ANN this set of operations is not immutable – one might  
402 opt to omit activation, invert values after every step, or do any other sort of mathematical  
403 transformation, at any step of the sequence. One could also adopt a different mental framework in  
404 which every individual operation is a layer of the network, such that each layer of a perceptron  
405 network expands into three sequential computational layers: a multiplication layer, a summation  
406 layer, and an activation layer. In Keras, the Python framework upon which the DeLINEATE  
407 toolbox's deep-learning functionality rests, it is possible to work with either of these  
408 conceptualizations – e.g., there are individual layer types that can perform thresholding/activation,  
409 but the activation operation can also be specified as an argument of other layer types, with the  
410 understanding that activation is applied last, after that layer's primary operation.

411 In lay terms, when sufficiently tortured and beaten into submission, contemporary deep learning  
412 frameworks can be mangled into performing virtually any kind of mathematical operation or  
413 transformation on the input data. A full discussion of all the possibilities could fill several books, and  
414 is thus beyond the introductory scope of this paper. However, there are a few broadly useful kinds of  
415 operation/layer that are particularly worth understanding; novices to deep learning should focus on  
416 understanding the basic gist of these fundamental tropes before getting lost in the details. Here, they  
417 are described briefly in broad categories; Keras has several subtypes of each depending on details of  
418 the desired implementation.

### 419 2.5.1 Classic

420 Called “Dense” layers in Keras, these are layers made of perceptrons (Figure 2A). They compute  
421 weighted sums and apply an activation function. Varying the number of computational units in such a  
422 layer allows one to increase (e.g., consider more potential weightings) or decrease (e.g., prune less  
423 informative features) the dimensionality of the data as it passes through the layer. By default, these  
424 layers are fully-connected, meaning that all outputs from one layer are used as inputs for each

---

<sup>27</sup> “Feedforward” meaning that all outputs from earlier (closer to the input) layers are fed “forward” into later (closer to the output) layers; outputs are never fed back into earlier layers. Feedforward networks are generally easier to work with and design. Our toolbox currently supports only networks with a broadly feedforward design (implemented via the “Sequential” model class in Keras) when using the graphical interface or text-based job files; however, when using it as a collection of Python functions, other network types are possible. One exception is recurrent layers, which feed their output back into themselves; thus networks containing recurrent layers are not strictly feedforward. However, as implemented in our toolbox and the Keras backend we rely on, the recurrency can be viewed as something that recurrent layers handle within themselves; the user does not have to think about this recurrency in terms of their network architecture. From the user's point of view, the *layers* of the network still follow a feedforward/sequential structure, even if the individual *units* within some layers have recurrency built-in.



425 computational unit in the next layer of the network. As noted earlier, a neural network made entirely  
 426 of dense layers is sometimes called a “multi-layer perceptron” network architecture.

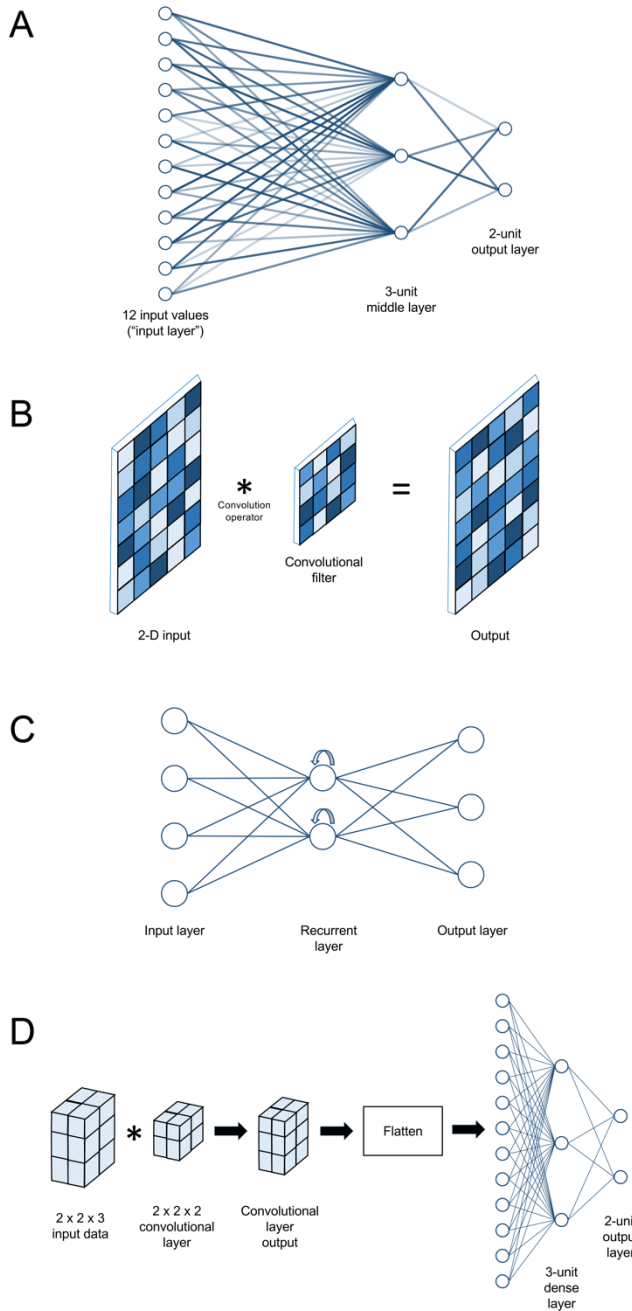

**Figure 2. Examples of artificial neural network architectures.**

(A) A simple fully-connected multi-layer perceptron model with 12 input values, a middle layer comprising three perceptrons, and an output layer with two perceptrons. Line lightness is used to represent synaptic weight strength. (B) An example of a convolutional neural network layer that might be used to analyze 2-D input. Here, the layer looks less like a set of artificial neurons and more like a digital filter used in image processing. Two-dimensional input is convolved with a 2-D filter to yield a 2-D output, sized similarly to the input. During training, it is the values in the convolutional filter that get adjusted. Square lightness represents the numeric values in the cells of each 2-D matrix. (C) An example of a simple recurrent neural network. There are many types of recurrent neural network structures with varying degrees of complexity, but all share the property that recurrent units' output gets passed back into them (represented here by curved arrows), giving them some form of “memory” for previous input values. (D) An example of a complete neural network architecture that might be used to analyze 3-D input such as MRI data for a two-class classification problem. In this simple example, 12 input values in a  $2 \times 2 \times 3$  array are first passed through a  $2 \times 2 \times 2$  convolutional filter, yielding another  $2 \times 2 \times 3$  array as output. This is then passed through a “flattening” layer to convert it to a  $12 \times 1$  vector, which then passes through a 3-unit dense layer to a 2-unit output layer (as shown in panel A).

### 427 2.5.2 Convolutional

428 Convolutional layers (Figure 2B) may be conceptualized as collections of filters that are swept across  
 429 (in mathematical terms, convolved with) their input. When used to process 2-D photographic data,  
 430 their function is often likened to visual neurons, which take input from a spatially restricted receptive  
 431 field, extract some feature if present, and pass along the result to the next layer of the visual  
 432 processing hierarchy. For readers familiar with digital image processing, they are essentially like  
 433 other kinds of digital filters (e.g., a blur filter, an edge detector), except that convolutional layers can  
 434 work with any dimensionality of data (not just 2-D images) and their parameters are learned over the

435 course of training, rather than being pre-defined. The combination of filter shape and input data  
436 structure will determine what kinds of feature may be selected for and passed along as output. For  
437 example, if each example of input data is a  $32 \times 1000$  array of EEG voltages (e.g., 2 seconds of 32-  
438 channel data sampled at 500 Hz), a set of  $1 \times 10$  filters would be capable of detecting high-frequency  
439 patterns within individual channels (in this example, patterns that fit inside a 20 ms time window),  
440 but insensitive to lower-frequency or purely spatial patterns. Conversely, a set of  $10 \times 1$  filters could  
441 detect patterns distributed across multiple channels, but only those that occur instantaneously.  
442 However, one could instead employ, for example, a set of  $8 \times 20$  filters, which would be capable of  
443 detecting patterns spread across up to eight adjacent channels over a 40 ms time window. Choices  
444 about data structure are consequently more important for this class of layers than for a multi-layer  
445 perceptron; the input examples would contain identical information if flattened from 32 channels  $\times$   
446 1000 timepoints to a single  $1 \times 32,000$  vector, but the meaning of a  $1 \times 10$  filter bank's outputs would  
447 be very different.

### 448 **2.5.3 Recurrent**

449 Recurrent layers (Figure 2C) are named for their property of having their outputs fed back into  
450 themselves as inputs. By maintaining an internal state determined by previous inputs, recurrent units  
451 develop a form of memory for sequential data. For example, a  $1 \times 10$  vector input to a classic dense  
452 unit would be combined to a single value in only two steps – multiplying each element of the vector  
453 by its weight and then summing the results. If the same vector were fed into a recurrent unit  
454 (typically called a cell), the first element would be handled in isolation, but evaluation of the second  
455 element would include the output of the cell's operation on the first element. The result of this would,  
456 in turn, update the unit's state to influence its response to the third element, and so on until each  
457 element of the input is consumed. Recurrent networks are frequently used to process natural language  
458 data (both audio and text) and in general are considered good choices for timeseries data. In our own  
459 work, we have not observed any significant benefit over convolutional layers when working with  
460 human neuroscience data, and have found recurrent-based networks to take longer to train than  
461 convolutional-based networks; however, these findings are likely highly dependent on details of the  
462 dataset and research question. As alluded earlier, for common types of recurrent cells, the recurrency  
463 is handled within the cell as a form of internal “memory” that is not visible to the rest of the network,  
464 so network architectures using recurrent layers can still be considered broadly “sequential” or  
465 feedforward, and are thus supported by our toolbox.

### 466 **2.5.4 Supporting**

467 This is a broad category of operations that, for various reasons, are generally thought of as secondary  
468 or historically baked-in to more interesting operations. In Keras, this includes activation layers,  
469 various purely utilitarian data-resaping or simple mathematical operations, dropout (an operation in  
470 which some percentage of a layer's units are ignored; thought to mitigate overfitting), etc. Some of  
471 these operations (e.g., activation functions) can be specified either as distinct layers or as parameters  
472 to a primary layer, whereas others (e.g., a layer that downsamples the output of the previous layer via  
473 averaging) can only be specified as distinct layers.

### 474 **2.5.5 Practical advice**

475 The following is a combination of our experience and advice we have received from other  
476 colleagues. We hope it is helpful as a starting point, but readers should not feel overly constrained by  
477 it. While the modern leaders in image recognition involve dozens of layers (Szegedy et al., 2016), in  
478 our experience the aim of dMVPA can typically be accomplished with much smaller networks. When  
479 working with minimally-processed fMRI/EEG/eye-tracking data, we have found that a good starting

480 point often consists of 1–2 convolutional layers followed by 2–3 dense layers; based on preliminary  
481 results from that architecture, one could add or remove layers, adjust the layers’ sizes, or tweak other  
482 hyperparameters. See Figure 2D for an example. For maximal effectiveness and interpretability,  
483 consideration should be given to the match between the shape of the per-example input data and  
484 shape of convolutional filters (e.g., should the filters look across EEG channels, or only within? If  
485 across, are channels arranged to be spatially adjacent in the data?). *Leaky ReLU* is usually our  
486 preferred activation function, and we have often found dropout values of  $\sim 0.3$  in dense layers to be  
487 beneficial. We have found *Stochastic Gradient Descent (SGD)* with the momentum parameter  
488 (classical or Nesterov) set to something on the order of 0.9 to be a generally successful optimizer,  
489 although the *Adam* optimizer (Kingma & Ba, 2014) also performs well in some situations<sup>28</sup>. New  
490 users are encouraged to experiment with everything and keep track of the results; soon, you will  
491 likely develop your own favorite architectures and hyperparameters. Do not be afraid to experiment  
492 broadly; dMVPA has some powerful advantages, but we are also in a more exploratory phase for this  
493 kind of research, and designing a sufficiently performant dMVPA architecture can take significant  
494 trial-and-error. Of course, the extent to which that exploration might constitute *p*-hacking depends on  
495 your research aims; if that is a potential concern, you may want to design your analysis based on an  
496 independent dataset (e.g., one of the sample datasets included in our toolbox), or consider a split-half  
497 design in which one half of your data is used to explore analysis architectures and the other half is  
498 used for confirmatory purposes.

### 499 **3 dMVPA: A toolbox**

#### 500 **3.1 The DeLINEATE Toolbox**

501 One major purpose of the DeLINEATE toolbox is to enable rapid exploration of model  
502 architectures/hyperparameters while maintaining an accurate record of what was done and how it  
503 turned out. These are conflicting goals in common practice – a researcher attempting to iterate on an  
504 analysis is often tweaking a script or working directly with a command-line interpreter, perhaps in a  
505 Notebook type environment (Grus, 2018), and discarding fruitless branches of exploration along the  
506 way. Maintaining an accurate record of each tweak and its results during such rapid prototyping is  
507 not easy, and can take more time and coding discipline than many of us have.

508 Our solution to this problem was a processing pipeline in which a single JSON (JavaScript Object  
509 Notation) format<sup>29</sup> job configuration file fully specifies an analysis: the input data, how it will be  
510 divided for cross-validation and rescaled, the model architecture to be trained and evaluated, and the  
511 outputs to be saved (Figure 3A). The toolbox translates this JSON file into Python code to execute  
512 the specified analysis (or analyses), and saves all desired outputs into .tsv (tab-separated values) files  
513 with names that include a user-defined prefix linking them to the original JSON file. A copy of that  
514 original JSON file can also be saved alongside the other output, so that even if the original is

---

<sup>28</sup> We realize that all this terminology can be overwhelming at first, but readers unfamiliar with deep learning should try not to feel discouraged by the sheer number of architecture/hyperparameter choices available. Rest assured that it does become more familiar and accessible after some hands-on experience.

<sup>29</sup> JSON is a format that allows data structures to be written to plain text files with human-readable syntax. Although not as intuitive as a graphical interface, editing JSON-formatted job files is certainly easier for beginners than writing their own Python code. There are also JSON modules available for many popular text editors and a handful of standalone JSON editing programs to make the task even easier.

515 subsequently overwritten during the exploration process, the “output” copy remains a pristine record  
516 of what was run to create a particular set of results.

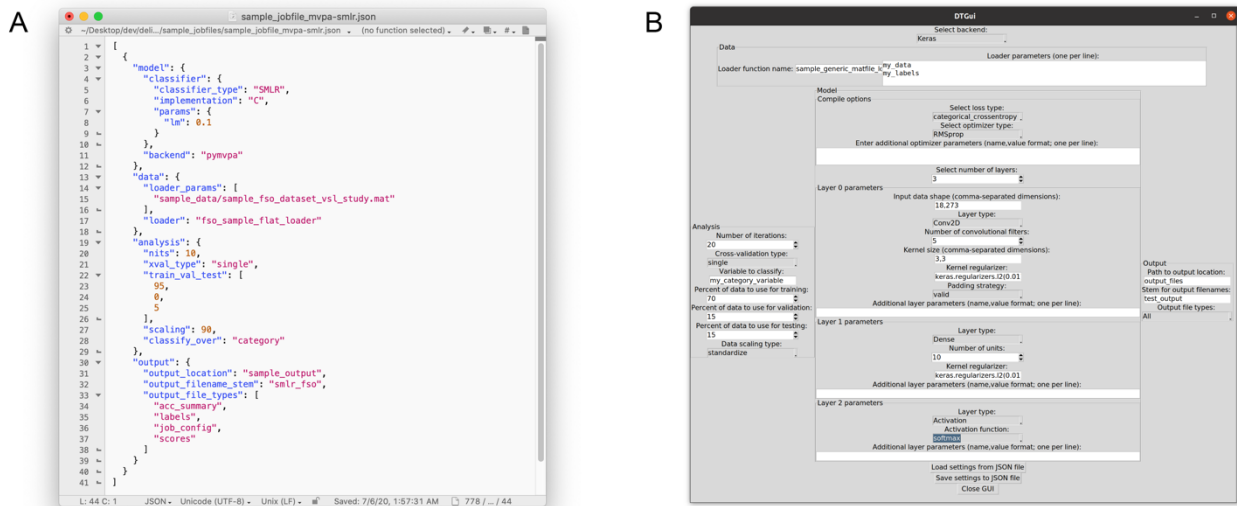

**Figure 3. Ways that users can configure an analysis in the DeLINEATE toolbox.**

(A) Most users will likely configure analyses using a text-based JSON (JavaScript Object Notation) format job file. In this example, the file is open in a generic text-editor program, but JSON-format-specific editing software also exists. Each job has four main sections: “model,” “data,” “analysis,” and “output,” corresponding to the major object types in the toolbox. The file shown is configured to run 10 iterations of a PyMVPA-based SMLR analysis using a sample face-scene-object-viewing EEG dataset, using a randomly selected 95% of trials as training data and 5% as test data on each iteration. (B) A basic graphical user interface (GUI) that allows users to configure a job file without having to edit the text directly. The most frequently used options for several common analysis types are available (although editing the text file directly will always allow more flexibility than is possible to express in a GUI). The GUI also contains sections for data, analysis, model, and output, as well as buttons for loading in an existing job file and saving the settings configured in the dialog box to a new JSON file. The settings shown are configured to run 20 iterations of a Keras-based deep learning analysis, using 70% of trials as training data, 15% as validation data, and 15% as test data on each iteration.

517 A secondary goal was to facilitate comparison of dMVPA approaches to traditional MVPA while, as  
518 much as possible, maintaining parity in data handling. To this end, classic MVPA is also supported  
519 alongside the dMVPAs that are our primary focus. This is currently implemented with a PyMVPA  
520 backend. Traditional MVPA uses the same JSON job file format as dMVPA, as well as similar  
521 output file formats, cross-validation/rescaling options, etc., making it a simple task to conduct  
522 parallel MVPA and dMVPA on the same data. Currently we support SVM (Support Vector Machine)  
523 and SMLR (Sparse Multinomial Logistic Regression) classifiers for traditional MVPA, although our  
524 framework is readily extensible to most other classifiers in the PyMVPA toolbox.

525 For a typical user, the primary entry point to the toolbox is *delineate.py*, a simple script that accepts  
526 one or more JSON-format configuration files as arguments, validates their contents, and uses them to  
527 create and run one or more analysis job(s). This allows users to run analyses without requiring them  
528 to write any code of their own. To further increase accessibility, we have recently developed a simple  
529 graphical user interface (GUI) that some find more approachable than a text editor (Figure 3B). GUI  
530 users can click on a collection of interactive menus to create properly-formatted job configuration  
531 files, which can then be used as input to the main *delineate.py* script. The GUI can also auto-populate

532 selections based on an existing job configuration file for users who have a starting point (such as one  
533 of the included sample job files) they wish to modify for future analyses.

534 For Python-proficient users who want more complex or flexible analysis options, the toolbox can  
535 also be used as a Python programming library, and users can write their own code instead of creating  
536 JSON files. JSON functionality and code-library functionality can also be mixed-and-matched (e.g.,  
537 JSON files can be used to create a template analysis, which can then be tweaked and iterated upon  
538 with custom code). For users who wish to write their own Python code as well as JSON users who  
539 simply want some familiarity with the toolbox's underlying functionality, we next present a brief  
540 overview of the code structure; more detail is available in the toolbox documentation.

### 541 3.2 DeLINEATE Toolbox structure

542 The DeLINEATE Toolbox is an object-oriented collection of Python modules, each responsible for a  
543 different aspect of the (d)MVPA process. It comprises five main object classes and a small number of  
544 supporting files that contain utility functions or facilitate batch analysis. Each main class is housed in  
545 a .py file named for that class. In typical usage, the toolbox follows a minimum-import philosophy;  
546 to use it as a code library, one simply needs to navigate to its main directory and directly import the  
547 desired class file(s). The primary classes are:

- 548 1. *DTJob*, responsible for parsing JSON files that define DeLINEATE jobs and passing the  
549 appropriate information to constructors for the other object types. In typical usage, a *DTJob* is  
550 responsible for creating one of each other object type and then triggering the *DTAnalysis*  
551 object to actually run the analysis. However, users can also eschew *DTJob* entirely if they  
552 prefer to instantiate the other objects manually in their own Python code.
- 553 2. *DTAnalysis*, a parent class that contains one instance each of *DTModel*, *DTData*, and  
554 *DTOutput*; it is responsible for coordinating the operations of those other objects. This  
555 includes dividing data into training/validation/testing sets, iterating through portions of the  
556 data when desired (e.g., to loop through individual subjects), and initiating the model  
557 training/testing procedures.
- 558 3. *DTModel*, responsible for constructing the model in the appropriate machine learning  
559 backend (currently, either Keras or PyMVPA). The “model” in this sense refers either to the  
560 artificial neural network (Keras) or an object representing a simpler classifier, e.g., a support  
561 vector machine with a linear kernel and parameter  $C=1$  (PyMVPA).
- 562 4. *DTData*, responsible for loading the dataset from a data file, storing it, and performing certain  
563 operations on it (such as scaling/normalization or slicing it up into smaller training,  
564 validation, and/or test subsets).
- 565 5. *DTOutput*, responsible for writing analysis results to output files.

566 The four main sections of a JSON-format job file are the *analysis*, *model*, *data*, and *output* sections,  
567 which map directly onto the corresponding Python classes; each section contains the parameters



568 necessary to instantiate an object of the appropriate class<sup>30</sup>. Another (purely optional) class, *DTGui*,  
569 implements the aforementioned GUI.

### 570 **3.3 Current functionality**

#### 571 **3.3.1 Model types and backends**

572 At present, the DeLINEATE toolbox has been used in-house for approximately two years to conduct  
573 analyses across a number of studies. It is a high-level toolbox with a flexible, extensible architecture  
574 that potentially allows it to sit atop multiple underlying machine-learning libraries. Currently, we  
575 support a subset of functionality for two backends: Keras (Chollet et al., 2015) for dMVPA and  
576 PyMVPA (Hanke et al., 2009) for traditional MVPA. With our heavy focus on providing a flexible  
577 architecture, it is relatively easy to add support for additional backends in the future, as well as  
578 enhancing the breadth of support for features of Keras and PyMVPA, enabling new data types to be  
579 imported, etc. The relative prioritization of such extensions will be guided by user demand.

#### 580 **3.3.2 Cross-validation**

581 We currently support two approaches to cross-validation. The first is a “universal” approach  
582 (specified in configuration files with the name “single”) in which all data are treated as belonging to a  
583 single pool, which is randomly divided into training/validation/test sets according to percentages  
584 specified in the configuration file. The second divides the data according to some attribute of the  
585 samples<sup>31</sup> and iterates through each value of this property, dividing the data within each iteration into  
586 training/validation/test sets (specified in configuration files as “loop\_over\_sa”). Regardless of which  
587 scheme is used, because classification performance can be influenced by a model’s initial  
588 conditions<sup>32</sup>, it is common practice to run multiple complete cross-validation iterations in order to  
589 ensure a stable estimate of the architecture’s performance. With properly configured input data (see  
590 below), these two cross-validation schemes can cover most common MVPA use cases; however,  
591 additional schemes can be added in the future according to demand.

#### 592 **3.3.3 Rescaling**

593 Although some MVPA methods are invariant to the scaling of the input data, others, such as many  
594 dMVPA applications, require data to be on a certain scale for good classification. The issue is  
595 slightly complicated by the need to prevent features of the test data from influencing the training  
596 data. We support several methods for rescaling data that avoid this issue by calculating necessary  
597 parameters solely on the training data, and using those parameters to adjust validation/test data as

---

<sup>30</sup> Although a non-Python-savvy user does not need to know these implementation details, the parity between job file sections and Python classes makes it easy for more experienced coders to switch back and forth between job files and their own Python scripts. As noted above, it is also possible to mix-and-match the two approaches.

<sup>31</sup> A “sample attribute,” if you will, which is the terminology used by other MVPA toolboxes for a tag or property associated with each data sample/example. For instance, a subject ID or session ID.

<sup>32</sup> Especially for dMVPA; for a given architecture, a classification might sometimes perform well and sometimes at chance depending on the random values assigned to weights at the beginning of training, which is generally a sign that the architecture needs adjusting. Other classification techniques, such as SVMs, are deterministic; as such, they may or may not benefit from multiple cross-validation iterations, depending on dataset and cross-validation scheme.

598 well. Again, these methods are readily extensible with additional options, or users can always pre-  
599 scale their own data however they like. Currently supported methods are:

- 600 1. “percentile”, which identifies the value at a specified percentile of the data and divides all  
601 data by that value,
- 602 2. “standardize”, which mean-centers and divides all values by the standard deviation of the  
603 data,
- 604 3. “mean\_center”, which subtracts the mean of the data from all values,
- 605 4. “map\_range”, which translates values into the range between a user-specified minimum and  
606 maximum (0 and 1, by default).

### 607 **3.3.4 Input data and loaders**

608 By far, the most common question we have received from potential users concerns the necessary  
609 format for input data. The toolbox operates on, at minimum, one NumPy array and one Python  
610 dictionary. The former contains the actual data to be analyzed in a two-or-more-dimensional array,  
611 where one dimension represents examples (e.g., trials) and the other dimension(s) are feature  
612 dimensions. For instance, an fMRI dataset might be shaped as (examples  $\times$  voxels), whereas an EEG  
613 dataset might be (examples  $\times$  electrode  $\times$  timepoint). Higher-dimensional structure is ignored in  
614 traditional MVPA and simply collapsed into a 2-D (examples  $\times$  features) array, as those simple  
615 classifiers can only operate on vectors of data. However, dMVPA, when run with an appropriate  
616 network architecture, can operate on any dimensionality of data and can potentially take that  
617 information into account for classification. If the spatiotemporal structure of the data is meaningful,  
618 this may produce superior performance. The Python dictionary contains the metadata needed to  
619 interpret the data array, in the form of one or more “sample attributes” (defined earlier; e.g.,  
620 experimental condition, participant identity) for each sample. These sample attributes may be used as  
621 targets for classification (i.e., the class labels to be predicted) or as grouping variables in cross-  
622 validation (e.g., for leave-one-subject-out cross-validation).

623 Data are read into the toolbox by a “loader” Python function specified in the job configuration file.  
624 Loaders can reside in a specific subdirectory of the toolbox or in an arbitrary user-specified location.  
625 We include several example datasets and corresponding loader functions that should be easily  
626 modifiable by researchers to fit their own needs. This is the main place where a typical user *might*  
627 need to write their own Python code; because of the many idiosyncratic formats used to store  
628 experimental data, some users may need to write a short function to read their files in and reshape  
629 them into the expected format. However, if the format is well-supported by NumPy or other Python  
630 libraries, these functions can typically be quite short (on the order of 10 lines of code). We also  
631 provide generic functions included for data in the NumPy and MATLAB native file formats, which  
632 will accept any .mat or .npy file containing one array variable of data examples and at least one  
633 variable of sample attributes. Thus, if users are able to save their data in one of those formats  
634 beforehand, there may be no need for a custom loader function.

635 Because neuroscience data vary widely in format, we recognize that a need for additional loader  
636 options could still present a barrier to some researchers. We encourage such individuals to reach out  
637 to us so that we can offer assistance and expand the range of formats we are able to support natively.  
638 On the other hand, the overall flexibility in format means that with just a few lines of code, any  
639 dataset that can be represented as a multi-dimensional array is a candidate for analysis with our

640 toolbox, not limited to neuroscience data; for instance, we have used the toolbox to analyze eye-  
641 tracking data (Cole et al., under review), photographic images, and more.

### 642 **3.3.5 Graphical User Interface**

643 As described earlier, the GUI currently allows users to generate a job configuration structure via  
644 menu selections and free-entry fields (Figure 3B) that can be auto-populated by loading an existing  
645 job file. For frequently used Keras layer types, some reasonable default hyperparameters are  
646 provided; however, there are minimal defaults available for less common layer types, and in general  
647 it is still recommended for users to have some baseline knowledge of Keras's workings and  
648 hyperparameter options, even when using the GUI. As the number of potential analysis  
649 configurations is effectively limitless and this module is a relatively recent addition, error checking is  
650 currently somewhat limited. Still, we recognize that a usable GUI is a critical feature for some users,  
651 and we expect this to be a primary target for expansion and refinement in upcoming releases.

### 652 **3.4 Availability**

653 All toolbox code is currently hosted at <https://bitbucket.org/delineate/delineate> and is freely  
654 accessible and open-source under the MIT License. There is also a project website at  
655 <http://www.delineate.it/> that hosts older releases, documentation, links to video tutorials, and more.

### 656 **3.5 Hardware/software requirements**

657 The DeLINEATE toolbox has few software dependencies of its own. However, as noted earlier, it  
658 requires either a Keras or PyMVPA backend to perform dMVPA or traditional MVPA, respectively,  
659 and those packages have their own corresponding dependencies. Fortunately, both Keras and  
660 PyMVPA are well-documented and readily available; we also provide start-to-finish setup guides on  
661 the toolbox website. In brief, DeLINEATE is compatible with any recent version of either backend,  
662 and in principle can be run on any Python version from 2.7 onward, including all versions of Python  
663 3; however, specific Python version compatibility may depend on which version of Keras/PyMVPA  
664 the user is running, and which Python versions *those* libraries are compatible with. The only  
665 additional dependency of DeLINEATE is Python support for Tcl/Tk (a graphical interface toolkit) if  
666 one wishes to use DTGui; most Python installations include Tcl/Tk libraries, but some might require  
667 a separate installation. As Python is available on all major operating systems (Windows, macOS, and  
668 Linux), DeLINEATE will also run on any of them, although hardware choices may constrain  
669 operating system options.

670 In terms of hardware, a bare-bones DeLINEATE installation will run on any computer with enough  
671 RAM to hold the user's dataset in memory, as long as the user only wishes to run analyses on the  
672 CPU. Traditional MVPA via PyMVPA does not presently employ GPU acceleration, but most  
673 dMVPA users will want to enable GPU acceleration for a dramatic increase in speed (see  
674 "Benchmarks" below). As Keras relies on the TensorFlow library for its own backend (or the older  
675 Theano library; now deprecated in recent Keras versions but still supported by DeLINEATE), which  
676 in turn relies on the CUDA (Compute Unified Device Architecture) and cuDNN (CUDA deep neural  
677 network) libraries from NVIDIA, effectively this means that an NVIDIA-compatible GPU is required  
678 for accelerated dMVPA. Different GPUs will have different compatibility with various versions of  
679 CUDA, cuDNN, TensorFlow/Theano, and Keras; however, as long as compatible versions of those  
680 tools are installed, DeLINEATE should work with any of them. At the time of writing, we  
681 recommend midrange to high-end GPUs from the GeForce 10 series or higher; our lab's workstations  
682 mostly use GeForce GTX 1070 through GeForce GTX 1080 Ti cards, but other users may have

683 higher or lower requirements. Currently, a reasonably powerful workstation for many dMVPA  
684 applications could be built from parts for \$1500–2000 US<sup>33</sup>, although prices can vary widely  
685 depending on users’ specific requirements and budgets. Since no current Apple computers support  
686 compatible NVIDIA GPUs, GPU-accelerated dMVPA is currently unavailable on macOS. Generally,  
687 for scientific computing, we recommend Linux-based operating systems for their widespread  
688 compatibility and open-source nature; however, GPU-accelerated dMVPA will work on Windows as  
689 well. In the future, if the macOS/NVIDIA compatibility situation changes, or if DeLINEATE adds  
690 support for additional backends, GPU-accelerated dMVPA may become available on macOS.

691 It has historically been difficult to implement large neural networks without setting up dedicated  
692 hardware, largely because the virtualization approaches favored for cloud-based computing do not  
693 provide sufficient access to GPUs. However, we have recently seen the emergence of an option that  
694 may be useful to those who lack either the budget or the technical confidence to set up their own deep  
695 learning environments. Google Colab (<https://colab.research.google.com>) is a browser-based Python  
696 environment akin to Jupyter Notebooks with some access to GPUs. Because the provided  
697 environment includes Keras/TensorFlow and allows interaction with files stored on Google Drive, it  
698 is relatively straightforward to execute DeLINEATE-based analyses by importing some of the classes  
699 and manually calling the method that begins an analysis. An example IPython notebook is provided  
700 in the Colab subfolder of the DeLINEATE repository. This approach requires some proficiency in  
701 Python and is subject to fluctuating resource limitations, so no promises can be made about speed or  
702 stability; however, it may be a good jumping-off point for beginning users wishing to explore the  
703 toolbox before investing in their own equipment.

### 704 3.6 Benchmarks

705 For both traditional MVPA and dMVPA, performance (both accuracy and computation time) will  
706 vary drastically across datasets, hardware, and choice of MVPA classifier or neural network  
707 architecture. Thus, the generalizability of any benchmarks is limited. However, to give readers a  
708 rough sense of the computational advantages of dMVPA and how running times scale for different  
709 dataset sizes, we prepared several datasets and analyzed them with both traditional MVPA and  
710 dMVPA. These benchmark datasets emulate the format of an fMRI dataset, but are entirely synthetic.  
711 The code to generate them is included in the toolbox.

712 We simulated datasets with three conditions (classes). Datasets ranged from 200 features (e.g.,  
713 voxels) to 25,600 features in a doubling progression (200, 400, 800, ...). The number of examples  
714 (trials) per condition ranged from 100 to 10,000 in the progression:  $10^2$ ,  $20^2$ ,  $30^2$ , ... Full details  
715 are given in the code. Briefly, for each condition, a random signal with the appropriate number of  
716 features was generated. Then, supposing for this example that we are generating 900 trials/condition,  
717 30 variations on the “canonical” signal for that condition would be generated by blending the  
718 canonical signal with a certain proportion of random noise. Then, for each of those 30 variations, 30  
719 sub-variations were generated by the same process. Although we did not particularly strive for  
720 biological verisimilitude, the intent was to somewhat mimic a circumstance where brain patterns had  
721 a small number of “true” variations (e.g., if the condition were “faces,” subjects might have slightly  
722 different voxel response patterns for different genders/races) as well as trial-to-trial variations due to

---

<sup>33</sup> Based on market prices for parts to build a system similar to ours at the time they were built, with an eight-core Intel i7-9700K CPU, GeForce GTX 1070 GPU, 32GB RAM, 1TB SSD primary storage, 4TB HDD secondary storage, and a compatible CPU cooler, motherboard, case, and power supply, for a total of \$1750 US. Newer GPUs and other parts have been released since those were built, but pricing for current parts is in a similar range.

723 stimulus exemplar effects and/or measurement noise. To make the classification more challenging,  
724 each trial's signal was also blended with a proportion of the signal of a trial from each of the other  
725 two conditions.

726 The datasets were analyzed with three classifier models: a simple CNN, SMLR, and SVM. The CNN  
727 used GPU acceleration (NVIDIA GeForce GTX 1080 Ti), whereas the other models used only the  
728 CPU (Intel Xeon X5650 @ 2.67GHz). Each analysis was typically run for 10 iterations (cycles of  
729 training/test with different randomly-selected training/test sets) except when running times became  
730 prohibitive, in which case the analysis was terminated after as few as five iterations.

731 Mean running times (Table 1) ranged drastically, from less than one second to several days. As  
732 expected, running times for all model types generally increased with greater numbers of features and  
733 trials. SVMs had both the shortest and longest running times. Compared to SVMs, SMLR had both a  
734 longer shortest running time and a shorter longest running time (i.e., the range was compressed on  
735 both ends), and CNNs continued this trend with an even longer shortest running time and a still  
736 shorter longest running time (i.e., the range was even more compressed). Notably, the CNN never  
737 took less than 10 seconds (largely due to a relatively fixed start-up time for Keras models) but its  
738 longest running times, for the most complex datasets, were still under 15 minutes. By comparison,  
739 SMLR's longest running times were over four hours, and SVMs' were multiple days. (And a few  
740 SVM models never converged in any reasonable amount of time.) Thus, as expected, deep learning  
741 models were less time-efficient than traditional MVPA for simpler datasets but were vastly more  
742 scalable for large datasets.

743 Benchmark datasets were intended to be classifiable at moderate accuracies but not particularly  
744 designed to be benchmarks *of* accuracy, so we do not report comprehensive accuracy results, which  
745 could invite misleading extrapolations to real data. However, generally all methods performed above  
746 chance, in a comparable range. Typically, the CNN had the lowest accuracy of all three models on  
747 datasets with few trials but usually had the highest accuracy with large trial counts, especially when  
748 feature counts were low. Conversely, SVM had the highest accuracy when trial counts were low or  
749 with very high feature counts, although in those high-feature-count analyses, the SVM running time  
750 was long enough to be unusable in many real-world scenarios. SMLR accuracy almost always fell  
751 between CNN and SMLR. Again, we do not expect these accuracies on synthetic data to perfectly  
752 reflect performance on real-world data, but they do fit general expectations of how models of varying  
753 complexity might be expected to overfit or underfit datasets of varying sizes.

## 754 **4 Discussion**

### 755 **4.1 Future development**

756 Toolbox development is ongoing and will largely be steered by community feedback. Current goals  
757 include adding support for non-sequential Keras models (e.g., those including feedback connections),  
758 transfer learning, model introspection, Generative Adversarial Networks (GANs), and additional  
759 built-in data loaders and cross-validation schemes. We also plan to make the GUI more informative  
760 and intuitive for users who are less familiar with Keras, and to include some tools for visualization  
761 and potentially analysis of results (although this remains an unsettled topic; see Hebart & Baker,  
762 2018, for relevant discussion). Although we have kept discussion in this paper fairly general,  
763 information is still liable to go out-of-date quickly due to the rapid pace of deep learning methods  
764 development; users are encouraged to consult our website for the most updated details.



## 765 **4.2 Summary**

766 Deep learning continues to grow and offer new possibilities for computation in many areas of  
767 research and private industry. While it is being increasingly used in neuroimaging and other  
768 neuroscience applications, adoption has been hampered by the complexity of the topic and the lack of  
769 approachable software tools. We hope that this tutorial review will help researchers new to deep  
770 learning address the former, and that the DeLINEATE software toolbox will help address the latter.  
771 In years to come, we expect dMVPA to enable a forward leap in neuroscience discoveries  
772 comparable to, or exceeding, that of traditional MVPA over older analyses.

773 **5 Tables**

774 **5.1 Table 1. Running times on synthetic benchmark datasets, in minutes**

| <b>CNN</b>  | Trials/<br>condition | 100  | 400  | 900  | 1600 | 2500 | 3600 | 4900 | 6400 | 8100 | 10000 |
|-------------|----------------------|------|------|------|------|------|------|------|------|------|-------|
| Features    |                      |      |      |      |      |      |      |      |      |      |       |
| 200         |                      | .207 | .231 | .244 | .250 | .258 | .295 | .365 | .363 | .438 | .475  |
| 400         |                      | .216 | .227 | .238 | .240 | .249 | .278 | .297 | .322 | .428 | .520  |
| 800         |                      | .213 | .231 | .242 | .248 | .262 | .279 | .305 | .341 | .421 | .437  |
| 1600        |                      | .202 | .258 | .270 | .282 | .298 | .337 | .367 | .414 | .499 | .532  |
| 3200        |                      | .205 | .322 | .357 | .372 | .376 | .430 | .499 | .564 | .683 | .709  |
| 6400        |                      | .195 | .326 | .505 | .542 | .657 | .678 | .724 | .900 | 1.18 | 1.15  |
| 12800       |                      | .292 | .503 | .914 | 1.20 | 1.61 | 1.99 | 2.35 | 2.97 | 2.17 | 2.28  |
| 25600       |                      | .360 | .920 | 1.32 | 2.49 | 3.71 | 7.41 | 7.73 | 9.43 | 13.5 | 12.1  |
| <b>SMLR</b> | Trials/<br>condition | 100  | 400  | 900  | 1600 | 2500 | 3600 | 4900 | 6400 | 8100 | 10000 |
| Features    |                      |      |      |      |      |      |      |      |      |      |       |
| 200         |                      | .024 | .049 | .053 | .086 | .081 | .112 | .127 | .137 | .178 | .219  |
| 400         |                      | .047 | .326 | .321 | .382 | .292 | .358 | .447 | .484 | .541 | .676  |
| 800         |                      | .087 | .329 | 1.49 | 1.74 | 1.70 | 1.77 | 1.89 | 1.94 | 2.19 | 2.57  |
| 1600        |                      | .137 | .563 | 1.70 | 5.40 | 7.78 | 9.09 | 10.1 | 10.3 | 10.8 | 10.8  |
| 3200        |                      | .194 | 1.37 | 2.53 | 6.06 | 12.6 | 24.4 | 30.0 | 41.3 | 50.8 | 54.2  |
| 6400        |                      | .258 | 2.59 | 5.59 | 9.57 | 16.6 | 29.4 | 46.9 | 70.7 | 112  | 140   |
| 12800       |                      | .354 | 4.19 | 13.7 | 20.5 | 28.3 | 42.9 | 64.6 | 91.2 | 128  | 170   |
| 25600       |                      | .456 | 5.90 | 23.6 | 52.8 | 63.8 | 76.6 | 104  | 144  | 192  | 253   |
| <b>SVM</b>  | Trials/<br>condition | 100  | 400  | 900  | 1600 | 2500 | 3600 | 4900 | 6400 | 8100 | 10000 |
| Features    |                      |      |      |      |      |      |      |      |      |      |       |
| 200         |                      | .003 | .103 | .516 | 1.09 | 2.28 | 6.37 | 20.6 | 47.5 | 88.1 | 148   |
| 400         |                      | .004 | .067 | 1.25 | 3.71 | 5.67 | 16.7 | 65.1 | 155  | 304  | 502   |
| 800         |                      | .008 | .090 | .710 | 5.32 | 10.4 | 32.0 | 159  | 439  | 920  | 1663  |
| 1600        |                      | .014 | .216 | .950 | 2.76 | 9.70 | 36.9 | 240  | 855  | 2302 | 4794  |
| 3200        |                      | .031 | .438 | 2.03 | 5.64 | 12.1 | 22.7 | 109  | 1098 | 3168 | ∞     |
| 6400        |                      | .068 | .892 | 4.32 | 13.2 | 28.3 | 55.2 | 134  | 392  | 2065 | ∞     |
| 12800       |                      | .134 | 1.85 | 9.11 | 28.0 | 65.5 | 133  | 357  | 1241 | ∞    | ∞     |
| 25600       |                      | .263 | 3.72 | 18.5 | 57.1 | 138  | 314  | 1048 | 3699 | ∞    | ∞     |

**Table 1. Running times on synthetic benchmark datasets, in minutes**

We processed a synthetic benchmark dataset with three models: a convolutional neural network (CNN), Sparse Multinomial Logistic Regression (SMLR), and Support Vector Machines (SVM). Average running time is listed in minutes. A few SVM models never converged in any reasonable amount of time and are represented in the table with the infinity symbol  $\infty$ . See text for further details.

775 **6 Nomenclature**

776 ANN: artificial neural network

777 CNN: convolutional neural network

778 CUDA®: NVIDIA Compute Unified Device Architecture

779 cuDNN: NVIDIA CUDA® Deep Neural Network library

780 DeLINEATE: Deep Learning In Neuroimaging: Exploration, Analysis, Tools, and Education

781 dMVPA: deep multivariate pattern analysis

782 DNN: deep neural network

783 GAN: generative adversarial network

784 JSON: Javascript object notation

785 ML: machine learning

786 MVPA: multivariate pattern analysis

787 SMLR: sparse multinomial logistic regression

788 SVM: support vector machine

789 **7 Conflict of Interest**

790 The authors declare that the research was conducted in the absence of any commercial or financial  
791 relationships that could be construed as a potential conflict of interest.

792 **8 Author Contributions**

793 KMK, JMW, PCL, and MRJ worked on toolbox code and co-wrote the manuscript. AS and PKR  
794 consulted on the analyses and related projects intertwined with toolbox development, and contributed  
795 to the writing of the manuscript.

796 **9 Funding**

797 This work was supported by NSF Grant CMMI 1719388, Biosensor Data Fusion for Real-time  
798 Monitoring of Global Neurophysiological Function awarded to PKR and colleagues, as well as  
799 NSF/EPSCoR Grant 1632849, RII Track-2 FEC: Neural networks underlying the integration of  
800 knowledge and perception, and NIH P20 GM130461, Rural Drug Addiction Research Center,  
801 awarded to MRJ and colleagues. We also received a GPU grant from NVIDIA Corporation. The  
802 content is solely the responsibility of the authors and does not necessarily represent the official views  
803 of the National Institutes of Health or the University of Nebraska.

## 804 **10 Acknowledgments**

805 We thank Aaron Halvorsen and Hannah Ross for assistance with figure creation and manuscript  
806 editing.

## 807 **11 References**

808 Akama, H., Murphy, B., Na, L., Shimizu, Y., and Poesio, M. (2012). Decoding semantics across  
809 fMRI sessions with different stimulus modalities: a practical MVPA study. *Frontiers in*  
810 *neuroinformatics*, 6:24. doi: <https://doi.org/10.3389/fninf.2012.00024>

811 Bentin, S., Allison, T., Puce, A., Perez, E., and McCarthy, G. (1996). Electrophysiological studies of  
812 face perception in humans. *Journal of cognitive neuroscience*, 8:6, 551-565.

813 Berger, H. (1929). Über das elektroencephalogramm des menschen. *Archiv für psychiatrie und*  
814 *nervenkrankheiten*, 87:1, 527-570.

815 Boser, B. E., Guyon, I. M., and Vapnik, V. N. (1992). “A training algorithm for optimal margin  
816 classifiers” in *Proceedings of the Fifth Annual Workshop on Computational Learning Theory*. (New  
817 York, NY, USA: ACM Press), 144–152.

818 Buzsaki, G., and Mizuseki, K. (2014). The log-dynamic brain: how skewed distributions affect  
819 network operations. *Nature Reviews Neuroscience*, 15:4, 264-278.

820 Chollet, F. (2015). Keras. <https://keras.io> [Accessed September 17, 2020]

821 Cortes, C., and Vapnik, V. (1995). Support-vector networks. *Machine Learning*, 20, 273–297.

822 De Martino, F., Valente, G., Staeren, N., Ashburner, J., Goebel, R., and Formisano, E. (2008).  
823 Combining multivariate voxel selection and support vector machines for mapping and classification  
824 of fMRI spatial patterns. *Neuroimage*, 43:1, 44-58.

825 Dosenbach, N. U., Nardos, B., Cohen, A. L., Fair, D. A., Power, J. D., Church, J. A., ... and Barnes,  
826 K. A. (2010). Prediction of individual brain maturity using fMRI. *Science*, 329:5997, 1358-1361.

827 Grus, J. (2018). I Don’t Like Notebooks. Talk given at Jupytercon, New York, NY. Video available  
828 at: <https://www.youtube.com/watch?v=7jiPeIFXb6U> [Accessed November 13, 2019]

829 Hanke, M., Halchenko, Y. O., Sederberg, P. B., Hanson, S. J., Haxby, J. V., and Pollmann, S. (2009).  
830 PyMVPA: a python toolbox for multivariate pattern analysis of fMRI data. *Neuroinformatics*, 7:1,  
831 37-53.

832 Haxby, J. V., Connolly, A. C., and Guntupalli, J. S. (2014). Decoding neural representational spaces  
833 using multivariate pattern analysis. *Annual Review of Neuroscience*, 37, 435-436. doi:  
834 10.1146/annurev-neuro-062012-170325

835 Haxby, J. V., Gobbini, M. I., Furey, M. L., Ishai, A., Schouten, J. L., and Pietrini, P. (2001).  
836 Distributed and overlapping representations of faces and objects in ventral temporal cortex. *Science*,  
837 293:5539, 2425-2430.

- 838 Hebart, M. N., and Baker, C. I. (2018). Deconstructing multivariate decoding for the study of brain  
839 function. *Neuroimage*, 180, 4-18.
- 840 Hebb, D. O. (1949). *The organization of behavior: a neuropsychological theory*. New York: John  
841 Wiley.
- 842 Hinton, G. E., Osindero, S., & Teh, Y. W. (2006). A fast learning algorithm for deep belief nets.  
843 *Neural computation*, 18:7, 1527-1554.
- 844 Kassam, K. S., Markey, A. R., Cherkassky, V. L., Loewenstein, G., and Just, M. A. (2013).  
845 Identifying emotions on the basis of neural activation. *PloS one*, 8:6. doi:  
846 <https://doi.org/10.1371/journal.pone.0066032>
- 847 Kay, K.N., David, S.V., Prenger, R.J., Hansen, K.A. and Gallant, J.L. (2008). Modeling low-  
848 frequency fluctuation and hemodynamic response timecourse in event-related fMRI. *Human Brain*  
849 *Mapping*, 29:2, 142-156.
- 850 Kingma, D. P., and Ba, J. (2014). Adam: A method for stochastic optimization. arXiv [Preprint].  
851 Available at: <https://arxiv.org/abs/1412.6980> (Accessed September 17, 2020).
- 852 Koch, C., and Laurent, G. (1999). Complexity and the nervous system. *Science*, 284:5411, 96-98.
- 853 Kohler, P. J., Fogelson, S. V., Reavis, E. A., Meng, M., Guntupalli, J. S., Hanke, M., ... and Peter, U.  
854 T. (2013). Pattern classification precedes region-average hemodynamic response in early visual  
855 cortex. *NeuroImage*, 78, 249-260.
- 856 Krishnapuram, B., Figueiredo, M., Carin, L., and Hartemink, A. (2005). Sparse Multinomial Logistic  
857 Regression: Fast Algorithms and Generalization Bounds. *IEEE Transactions on Pattern Analysis and*  
858 *Machine Intelligence (PAMI)*, 27, 957–968.
- 859 Lim, P. C., Ward, E. J., Vickery, T. J., and Johnson, M. R. (2019). Not-so-working memory: Drift in  
860 functional magnetic resonance imaging pattern representations during maintenance predicts errors in  
861 a visual working memory task. *Journal of Cognitive Neuroscience*, 31:10, 1520-1534.
- 862 Linnainmaa, S. (1970). The representation of the cumulative rounding error of an algorithm as a  
863 Taylor expansion of the local rounding errors. [Master's thesis]. [Helsinki, Finland]: University of  
864 Helsinki.
- 865 Lore, K. G., Akintayo, A., and Sarkar, S. (2017). LLNet: A deep autoencoder approach to natural  
866 low-light image enhancement. *Pattern Recognition*, 61, 650-662.
- 867 Maas, A. L., Hannun, A. Y., and Ng, A. Y. (2013). Rectifier nonlinearities improve neural network  
868 acoustic models. *Proc. icml*, 30:1, 3.
- 869 McCulloch, W.S., and Pitts, W. (1943). A logical calculus of the ideas immanent in nervous activity.  
870 *Bulletin of Mathematical Biophysics* 5, 115–133.
- 871 Minsky, M., and Papert, S. (1969). *Perceptrons: An Introduction to Computational Geometry*. MIT  
872 Press.



- 873 Ngiam, J., Khosla, A., Kim, M., Nam, J., Lee, H., and Ng, A. Y. (2011). Multimodal deep learning.  
874 ICML, 11, 689-696.
- 875 Nili, H., Wingfield, C., Walther, A., Su, L., Marslen-Wilson, W., and Kriegeskorte, N. (2014). A  
876 toolbox for representational similarity analysis. *PLoS computational biology*, 10:4, e1003553.
- 877 Poldrack, R. A., Barch, D. M., Mitchell, J., Wager, T., Wagner, A. D., Devlin, J. T., ... and Milham,  
878 M. (2013). Toward open sharing of task-based fMRI data: the OpenfMRI project. *Frontiers in*  
879 *neuroinformatics*, 7, 12.
- 880 Raina, R., Madhavan, A., and Ng, A. Y. (2009). Large-scale deep unsupervised learning using  
881 graphics processors. *Proceedings of the 26th annual international conference on machine learning*,  
882 873-880.
- 883 Rosenblatt, F. (1958). The perceptron: A probabilistic model for information storage and  
884 organization in the brain. *Psychological Review*. 65:6, 386–408. doi:10.1037/h0042519.
- 885 Rumelhart, D. E., Hinton, G. E., and Williams, R. J. (1986a). Learning representations by back-  
886 propagating errors. *Nature*, 323, 533–536.
- 887 Rumelhart, D. E., Hinton, G. E., and Williams, R. J. (1986b). Learning internal representations by  
888 error propagation. *Parallel distributed processing: Explorations in the microstructure of cognition*, 1.
- 889 Shalev-Shwartz, S., and Ben-David, S. (2014). *Understanding machine learning: From theory to*  
890 *algorithms*. Cambridge University Press.
- 891 Sporns, O., Tononi, G., & Edelman, G. M. (2000). Connectivity and complexity: the relationship  
892 between neuroanatomy and brain dynamics. *Neural networks*, 13(8-9), 909-922.
- 893 Szegedy, C., Ioffe, S., Vanhoucke, V., & Alemi, A. (2016). Inception-v4, inception-resnet and the  
894 impact of residual connections on learning. *arXiv preprint arXiv:1602.07261*.
- 895 Van Essen, D. C., Smith, S. M., Barch, D. M., Behrens, T. E., Yacoub, E., Ugurbil, K., & Wu-Minn  
896 HCP Consortium. (2013). The WU-Minn human connectome project: an overview. *Neuroimage*, 80,  
897 62-79.
- 898 Werbos, P. (1974). *Beyond Regression: New Tools for Prediction and Analysis in the Behavioral*  
899 *Sciences*. [PhD thesis]. [Cambridge (MA)]: Harvard University.
- 900 Williams, J. M., Samal, A., Rao, P. K., and Johnson, M. R. (2020). Paired Trial Classification: A  
901 Novel Deep Learning Technique for MVPA. *Frontiers in Neuroscience*, 14, 417.
- 902 Wolpert, D.H., Macready, W.G. (1997), "No Free Lunch Theorems for Optimization", *IEEE*  
903 *Transactions on Evolutionary Computation* 1, 67
- 904 Xie, J., Girshick, R., and Farhadi, A. (2016). Unsupervised deep embedding for clustering analysis.  
905 *International conference on machine learning*, 478-487.
- 906 Xue, G., Dong, Q., Chen, C., Lu, Z., Mumford, J. A., and Poldrack, R. A. (2010). Greater neural  
907 pattern similarity across repetitions is associated with better memory. *Science*, 330:6000, 97-101.

908 Zeiler, M. D., and Fergus, R. (2014). Visualizing and understanding convolutional networks.  
909 European conference on computer vision, 818-833.

910 Zeiler, M. D., and Fergus, R. (2013). Stochastic pooling for regularization of deep convolutional  
911 neural networks. arXiv [Preprint]. Available at <https://arxiv.org/abs/1301.3557> (Accessed September  
912 17, 2020)

913 Zou, H., & Hastie, T. (2005). Regularization and variable selection via the elastic net. *Journal of the*  
914 *royal statistical society: series B (statistical methodology)*, 67(2), 301-320.

## 915 **12 Data Availability Statement**

916 The toolbox code and sample data are available through a Git repository hosted at  
917 <https://bitbucket.org/delineate/delineate/src/master/>. Release versions of the toolbox and additional  
918 documentation, as well a link to the Git repository, can be found at <http://delineate.it>.
